# Supplementary material for: Highly-effective photocatalytic properties and interfacial transfer efficiencies of charge carriers for the novel Ag2CO3/AgX heterojunctions achieved by surface modification
Source: Royal Society of Chemistry journal article supplement (doi:10.1039/c4dt00058g), 2014-01-01
Supplement: c4dt00058g1.pdf [file c4dt00058g1.pdf]

## Supporting Information

# High-effective photocatalytic properties and interfacial transfer efficiencies of charge carriers for the novel $\text{Ag}_2\text{CO}_3/\text{AgX}$ heterojunctions achieved by surface modification

*Hongjun Dong,<sup>ab</sup> Gang Chen,<sup>\*a</sup> Jingxue Sun,<sup>a</sup> Yujie Feng<sup>\*c</sup>, Chunmei Li,<sup>a</sup> Guihong Xiong<sup>a</sup> and Chade Lv<sup>a</sup>*

<sup>a</sup> Department of Chemistry, Harbin Institute of Technology, Harbin 150001, P. R. China

<sup>b</sup> Department of Chemistry, Baicheng Normal University, Baicheng 137000, P. R. China

<sup>c</sup> State Key Laboratory of Urban Water Resource and Environment, Harbin Institute of Technology, Harbin 150090, P. R. China

\*Corresponding author: E-mail: [gchen@hit.edu.cn](mailto:gchen@hit.edu.cn), Fax: (+86)-451-86413753; [yujief@hit.edu.cn](mailto:yujief@hit.edu.cn)

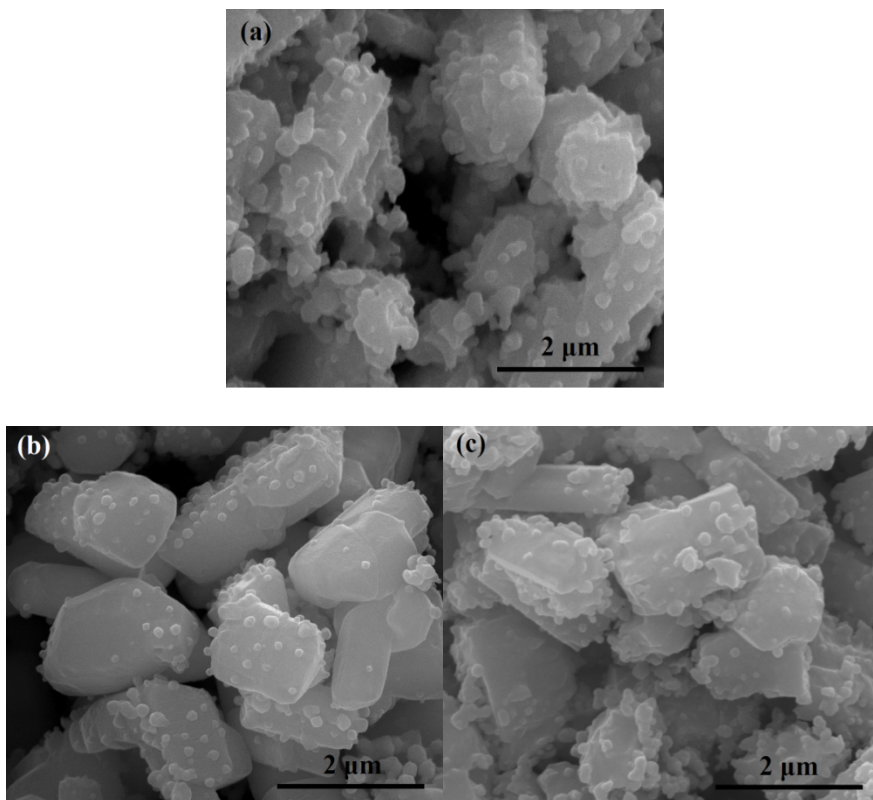

**Fig. S1** High-resolution FESEM images of  $\text{Ag}_2\text{CO}_3/\text{AgX}$  (Cl (a), Br(b) and I (c)) samples

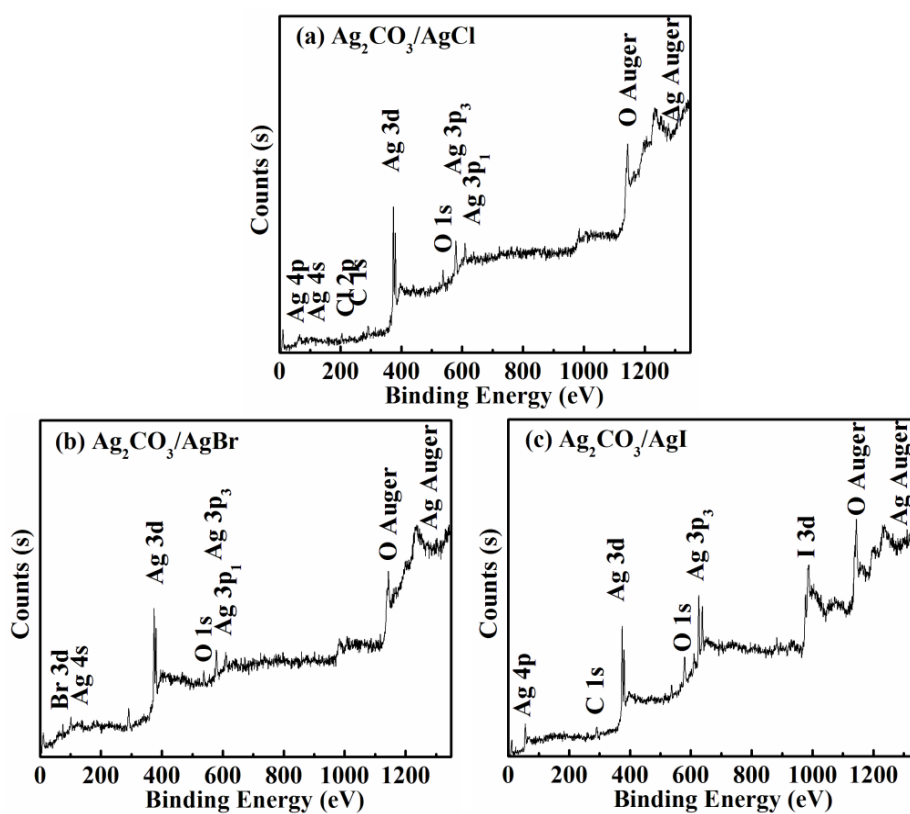

**Fig. S2** Total XPS spectra of  $\text{Ag}_2\text{CO}_3/\text{AgX}$  samples

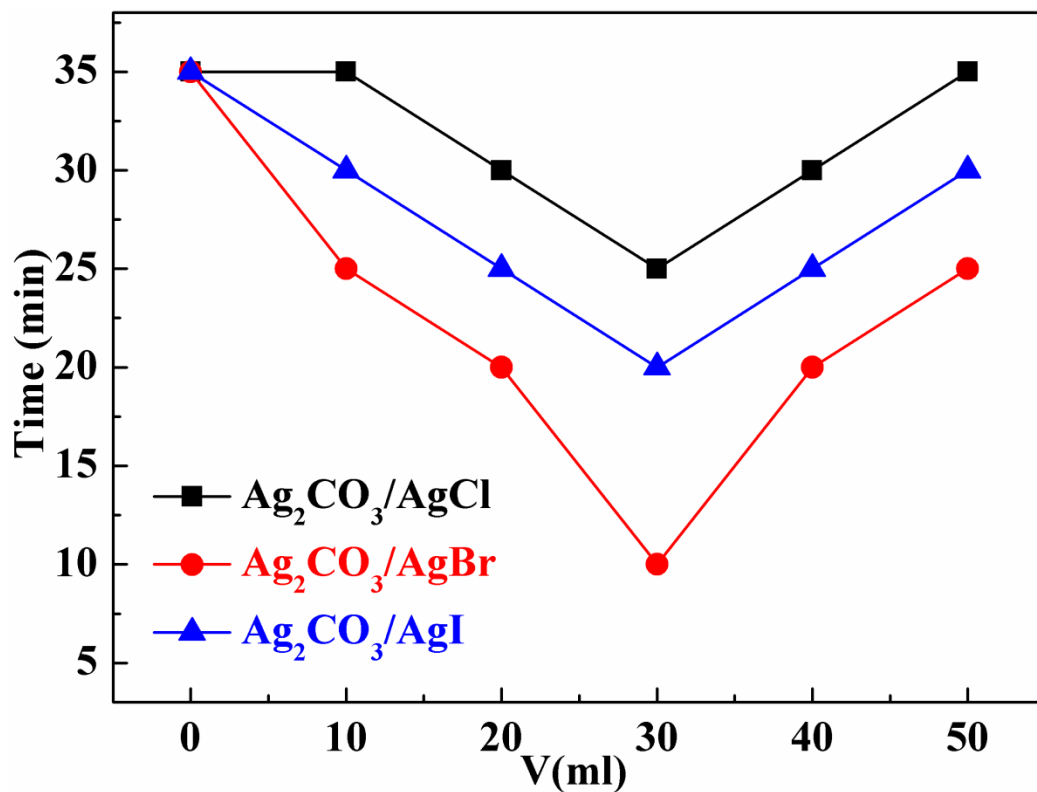

Fig. S3 Degradation time of RhB over Ag<sub>2</sub>CO<sub>3</sub>/AgX samples obtained by adding different volumes of KX solution

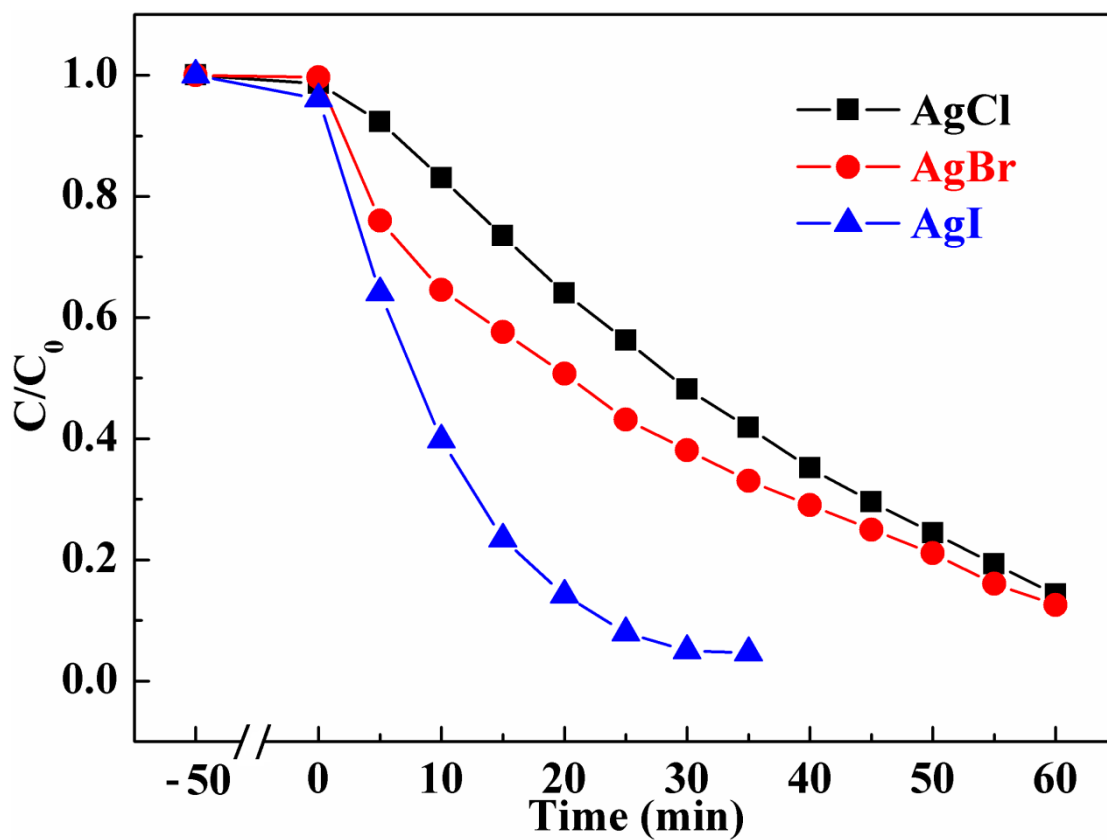

Fig. S4 Dynamic curves of RhB solutions over AgX samples.

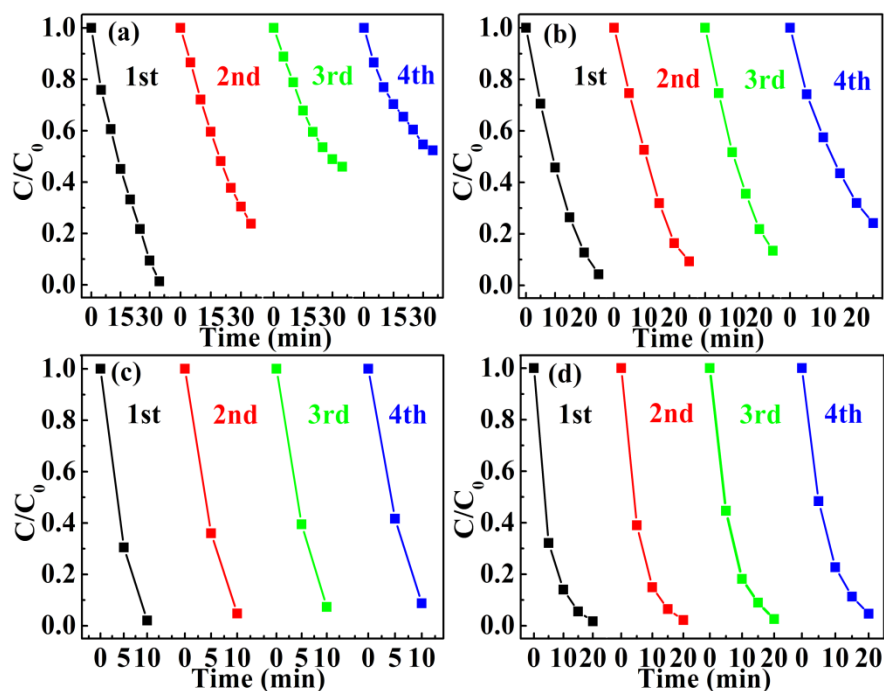

Fig. S5 Circle runs of RhB dyes over  $\text{Ag}_2\text{CO}_3$  (a) and  $\text{Ag}_2\text{CO}_3/\text{AgX}$  (Cl (b), Br(c) and I (d)) samples.

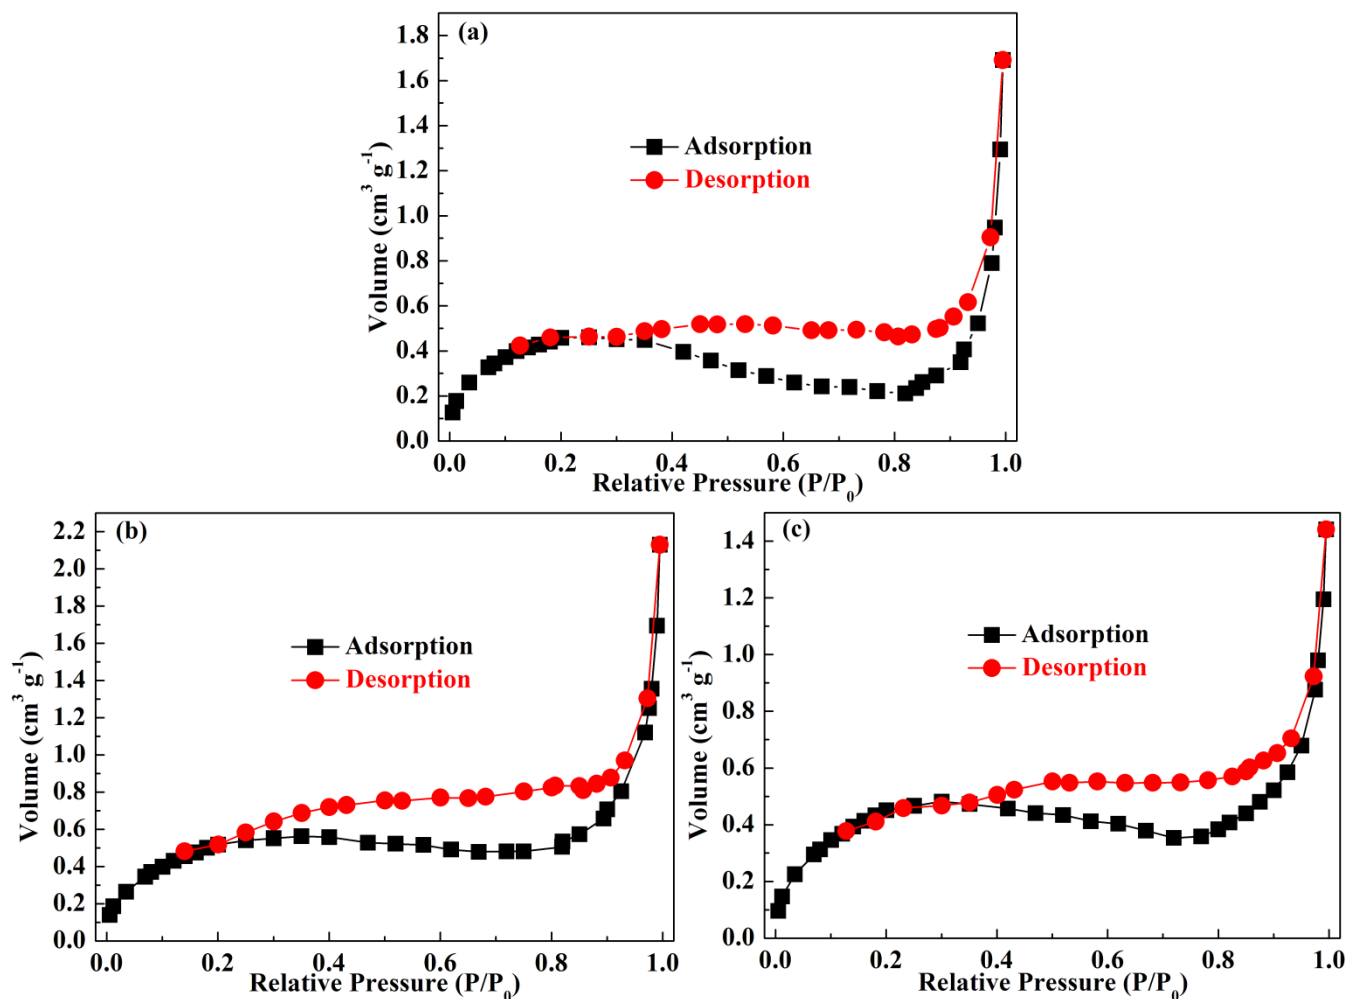

Fig. S6  $\text{N}_2$  adsorption and desorption isotherm of  $\text{Ag}_2\text{CO}_3/\text{AgX}$  (Cl (a), Br(b) and I (c)) samples

The band positions of AgCl, AgBr, AgI and Ag<sub>2</sub>CO<sub>3</sub> can be calculated by the following empirical formulae:

$$E_{CB} = X - E_c - 1/2E_g$$

$$E_{VB} = E_{CB} + E_g$$

where  $X$  is the absolute electronegativity of the atom semiconductor, expressed as the geometric mean of the absolute electronegativity of the constituent atoms, which is defined as the arithmetic mean of the atomic electron affinity and the first ionization energy;  $E_c$  is the energy of free electrons of the hydrogenscale (4.5 eV);  $E_g$  is the band gap of the semiconductor;  $E_{CB}$  is the conduction band potential and  $E_{VB}$  is the valence band potential. The band gaps of AgCl, AgBr, AgI and Ag<sub>2</sub>CO<sub>3</sub> are 3.25 eV<sup>1</sup>, 2.60 eV<sup>2,3</sup>, 2.80 eV<sup>4</sup> and 2.46 eV<sup>5</sup>, respectively. According to the above equation, the tops of the VB of them are calculated to be 3.31, 2.64, 2.38 and 2.75 eV, as well as the bottoms of the CB of them are calculated to be 0.06, 0.04, -0.42 eV and 0.29 eV, respectively, as shown in Table S1.

Table S1  $X$ ,  $E_g$ ,  $E_{CB}$ , and  $E_{VB}$  of AgCl, AgBr, AgI and Ag<sub>2</sub>CO<sub>3</sub> samples

| Semiconductor                   | $X$ (eV) | $E_g$ (eV) | $E_{CB}$ (eV) | $E_{VB}$ (eV) |
|---------------------------------|----------|------------|---------------|---------------|
| AgCl                            | 6.07     | 3.25       | 0.06          | 3.31          |
| AgBr                            | 5.84     | 2.60       | 0.04          | 2.64          |
| AgI                             | 5.48     | 2.80       | -0.42         | 2.38          |
| Ag <sub>2</sub> CO <sub>3</sub> | 6.02     | 2.46       | 0.29          | 2.75          |

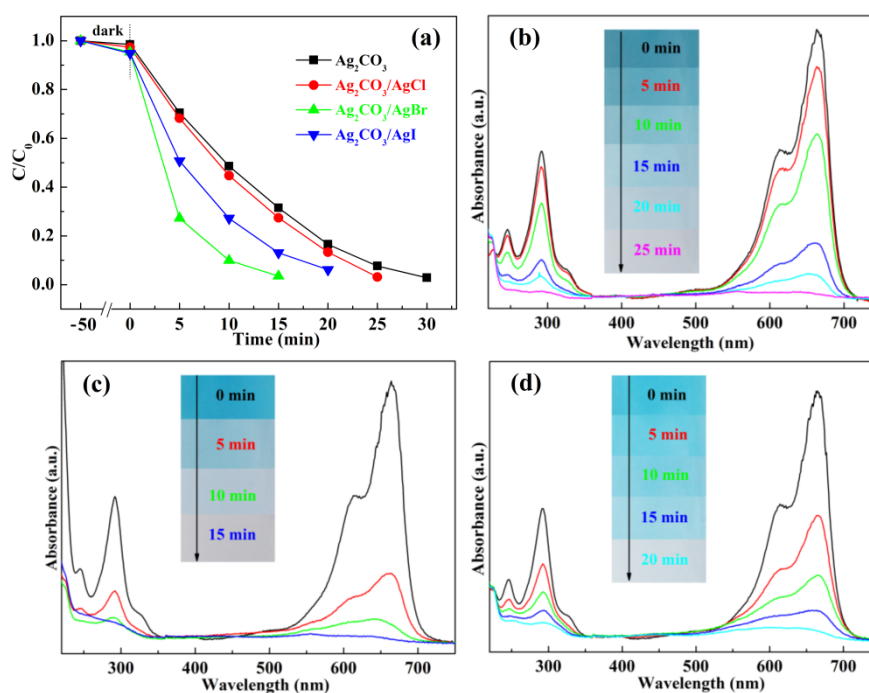

**Fig. S7** Dynamic curves (a) and absorbency variations of MB solutions over Ag<sub>2</sub>CO<sub>3</sub> and Ag<sub>2</sub>CO<sub>3</sub>/AgX (X = Cl (b), Br (c) and I (d)) under visible light.

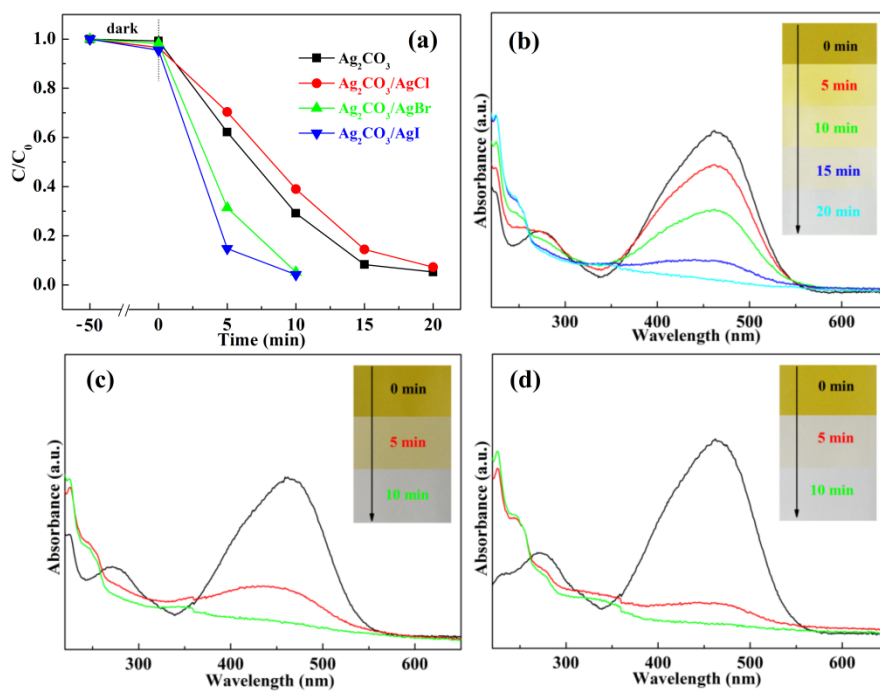

**Fig. S8** Dynamic curves (a) and absorbency variations of MO solutions over  $\text{Ag}_2\text{CO}_3$  and  $\text{Ag}_2\text{CO}_3/\text{AgX}$  ( $X = \text{Cl}$  (b),  $\text{Br}$  (c) and  $\text{I}$  (d)) under visible light.

## Reference

- (1) C. H. An, S. Peng and Y. G. Sun, *Adv. Mater.*, 2010, **22**, 2570-2574.
- (2) N. M. Correa, H. Zhang and Z. A. Schelly, *J. Am. Chem. Soc.*, 2000, **122**, 6432-6434.
- (3) H. Wang, J. T. Yang, X. L. Li, H. Z. Zhang, J. H. Li and L. Guo, *Small*, 2012, **8**, 2802-2806.
- (4) H. G. Yu, L. Liu, X. F. Wang, P. Wang, J. G. Yu and Y. H. Wang, *Dalton Trans.*, 2012, **41**, 10405-10411.
- (5) H. J. Dong, G. Chen, J. X. Sun, C. M. Li, Y. G. Yu and D. H. Chen, *Appl. Catal. B: Environ.*, 2013, **134-135**, 46-54.
